# Supplementary figures and images for: Tumor-Targeting Peptides: The Functional Screen of Glioblastoma Homing Peptides to the Target Protein FABP3 (MDGI)
Source: MDPI journal article supplement (doi:10.3390/cancers12071836), 2020-07-08

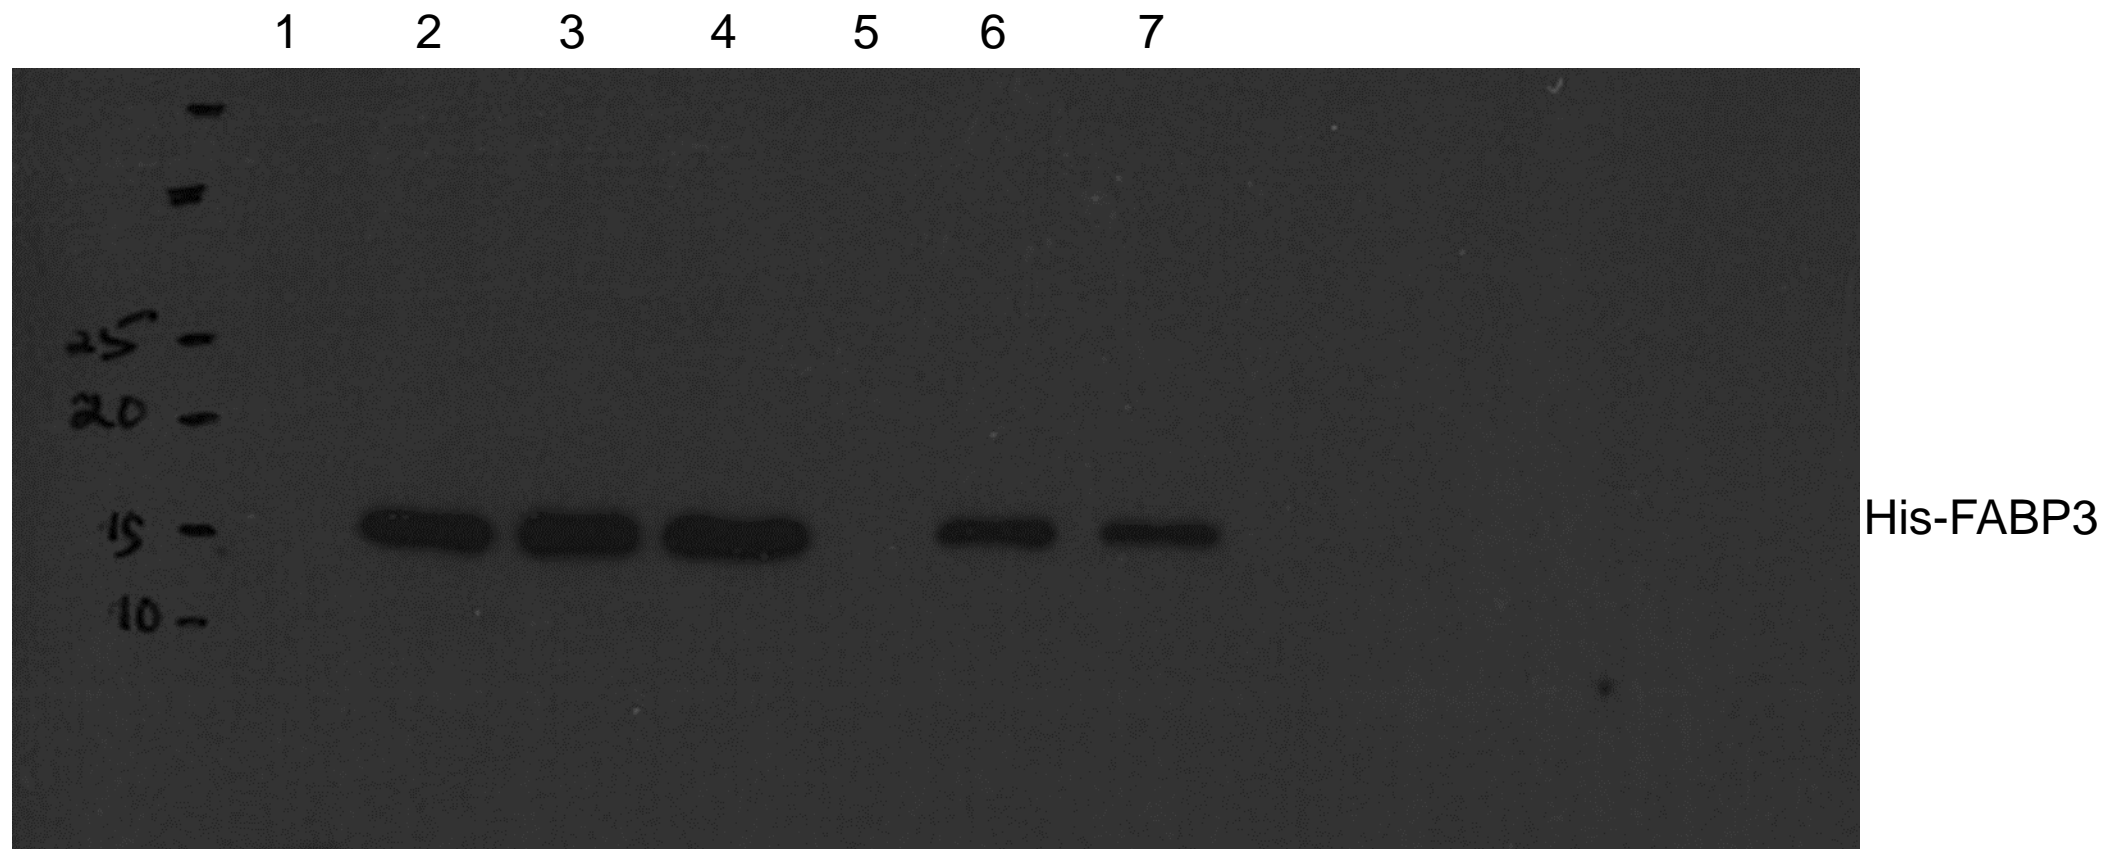

Figure 1A

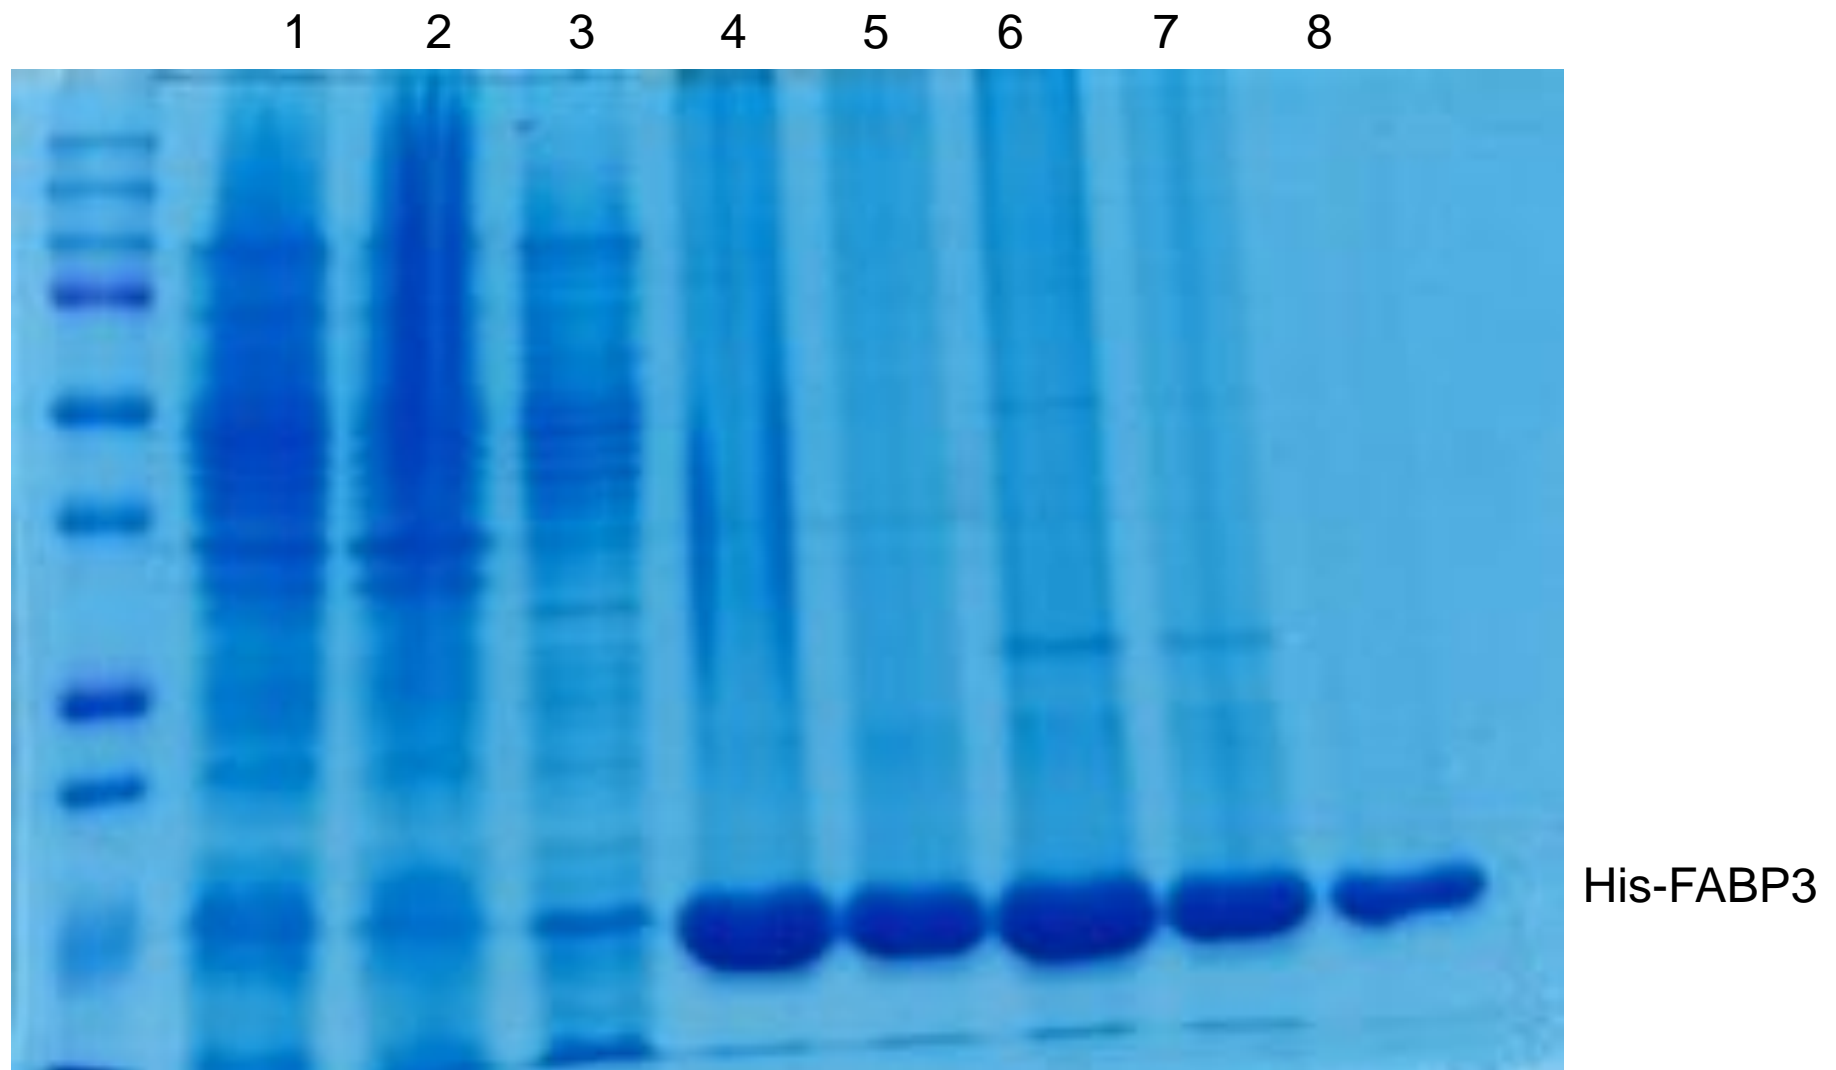

Figure 1B

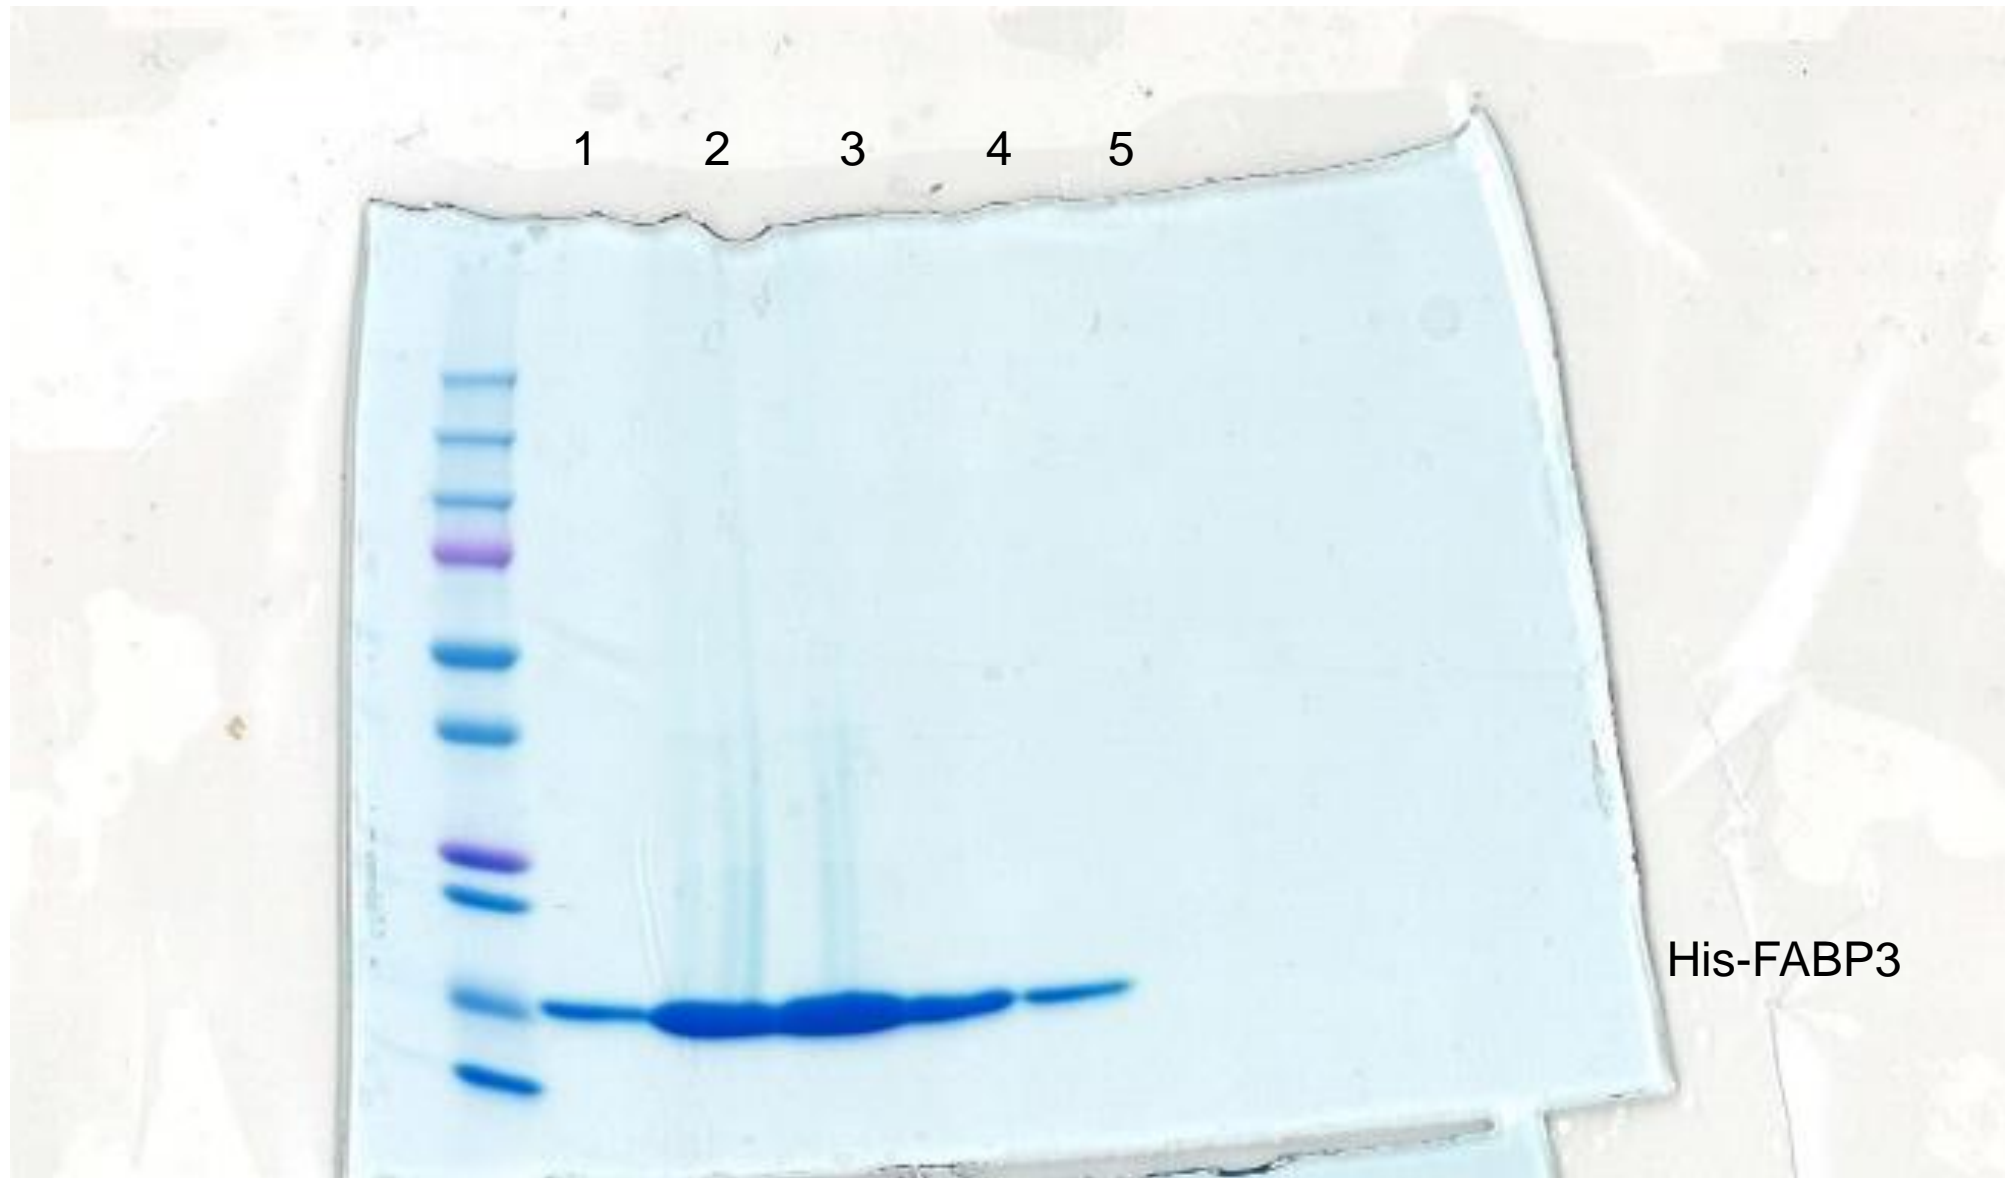

Figure 1C

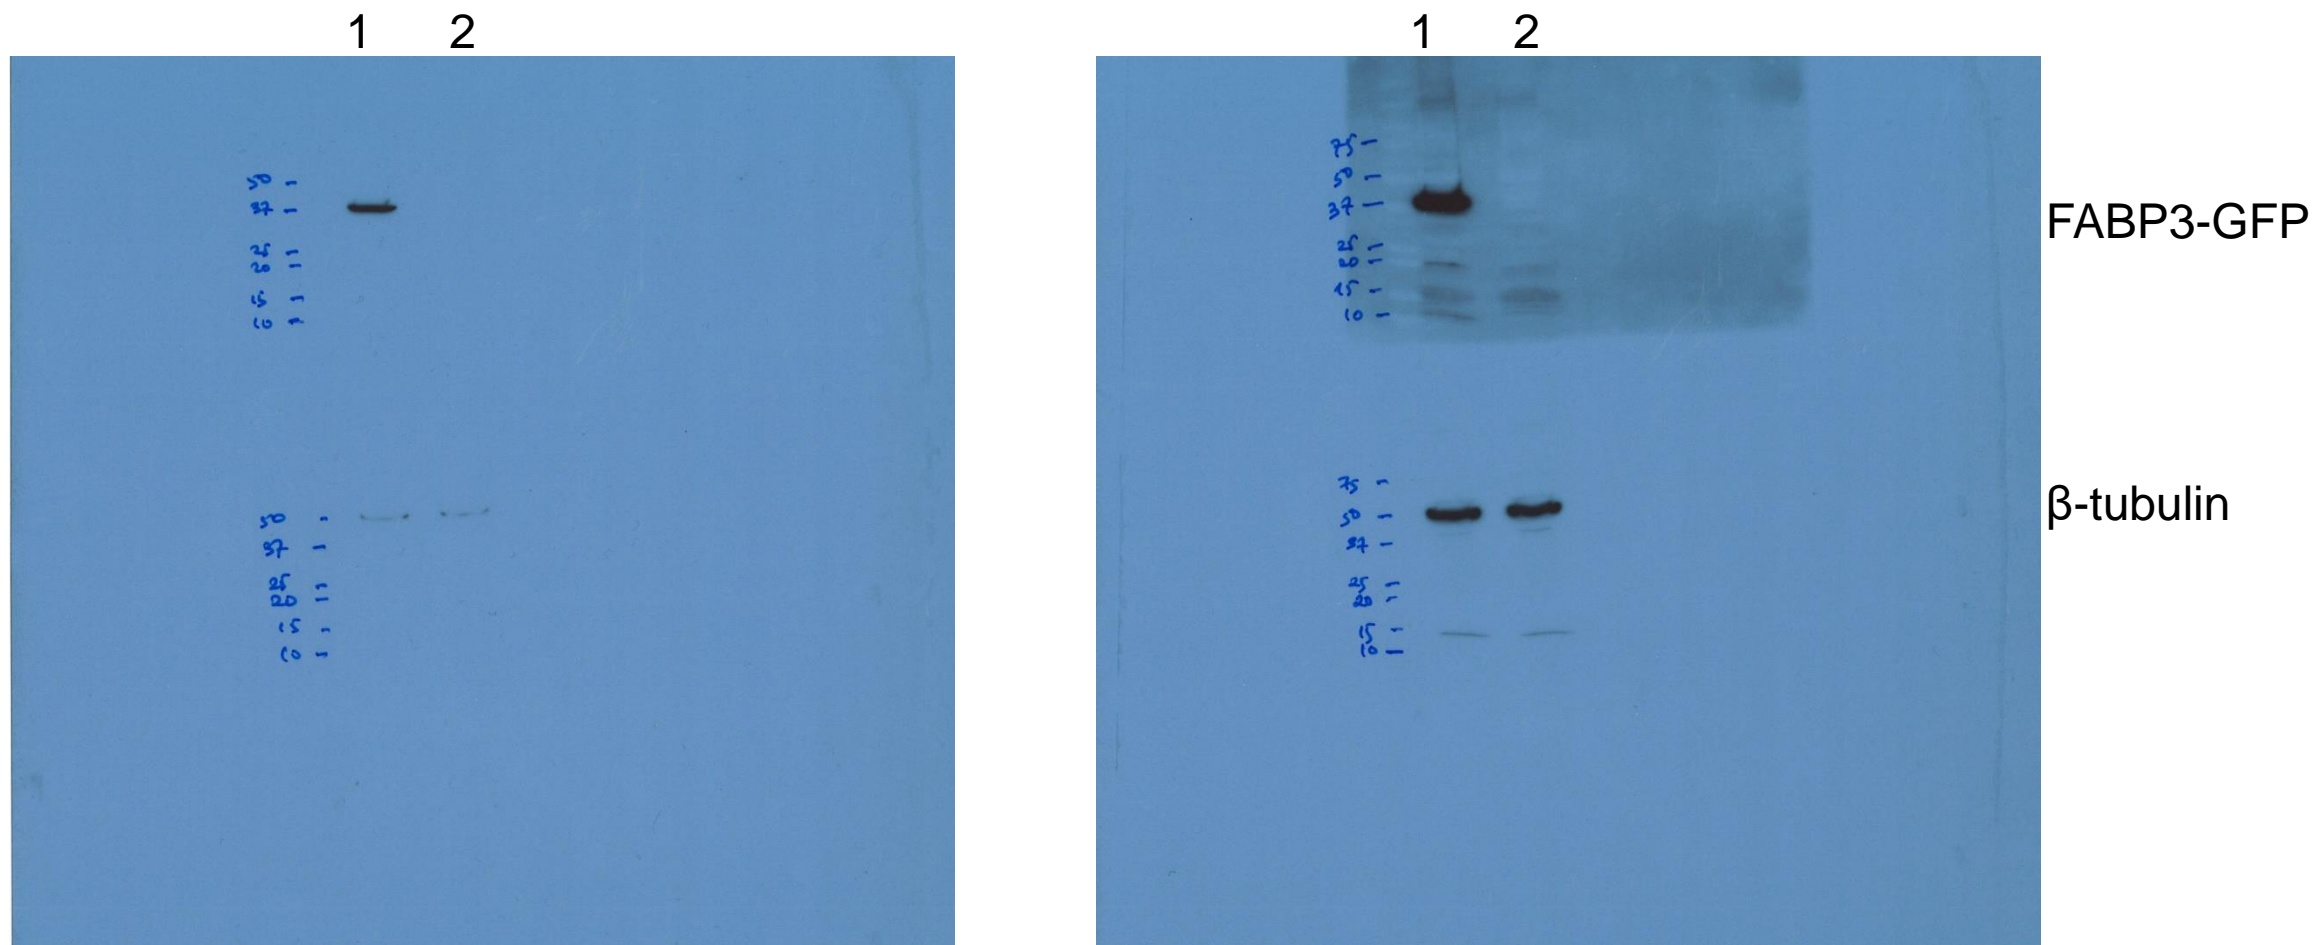

Figure 6A

Supplement: s1 [file s1]
